# Supplementary material
Source: PubMed Central journal article supplement (PMC6957728)
Supplement: NIHMS1061727-supplement-1.pdf [file NIHMS1061727-supplement-1.pdf]

## Supplementary Tables

### List of Supplementary Tables

1. **Supplementary Table 1: List of genes sequenced using custom Roche NimbleGenSeqCap or a Roche NimbleGenHeatSeq pane.....3**
2. **Supplementary Table 2: Original and revised pathological diagnosis in patients who underwent percutaneous renal biopsy.....10**
3. **Supplementary Table 3: ACMG Evidence in those in whom a pathogenic variant was detected, including presence or absence of ACMG pathogenic criteria weighted as very strong (PVS1), strong (PS1-4), moderate (PM1-6), or supporting (PP1-5) .....13**
4. **Supplementary Table 4: Rationale for inclusion for genotyping based on family history and extra-renal symptoms.....17**

**Supplementary Table 1: List of genes sequenced using custom Roche NimbleGenSeqCap or a Roche NimbleGenHeatSeq panel**

| Gene            | OMIM                                                                                                              |
|-----------------|-------------------------------------------------------------------------------------------------------------------|
| <i>ACE</i>      | Renal tubular dysgenesis                                                                                          |
| <i>ACTN4</i>    | Glomerulosclerosis, focal segmental, 1                                                                            |
| <i>ADAMTS13</i> | Thrombotic thrombocytopenic purpura, familial                                                                     |
| <i>ADCK4</i>    | Nephrotic syndrome, type 9                                                                                        |
| <i>AGT</i>      | Renal tubular dysgenesis                                                                                          |
| <i>AGTR1</i>    | Renal tubular dysgenesis                                                                                          |
| <i>AGXT</i>     | Hyperoxaluria, primary, type 1                                                                                    |
| <i>AHI1</i>     | Joubert syndrome 3                                                                                                |
| <i>ANKS6</i>    | Nephronophthisis 16                                                                                               |
| <i>ANLN</i>     | Focal segmental glomerulosclerosis 8                                                                              |
| <i>APOA1</i>    | Amyloidosis, 3 or more types                                                                                      |
| <i>APOA2</i>    |                                                                                                                   |
| <i>APOE</i>     | Lipoprotein glomerulopathy                                                                                        |
| <i>APOL1</i>    | End-stage renal disease, nondiabetic, susceptibility to glomerulosclerosis, focal segmental, 4, susceptibility to |
| <i>APRT</i>     | Adenine phosphoribosyltransferase deficiency                                                                      |
| <i>AQP2</i>     | Diabetes insipidus, nephrogenic                                                                                   |
| <i>ARHGAP24</i> | None listed – for discussion of possible association with focal segmental glomerulosclerosis                      |
| <i>ARHGDI1</i>  | Nephrotic syndrome, type 8                                                                                        |
| <i>ARL13B</i>   | Joubert syndrome 8                                                                                                |
| <i>ARL6</i>     | Bardet-Biedl syndrome 3                                                                                           |
| <i>ATP6V0A4</i> | Renal tubular acidosis, distal, autosomal recessive                                                               |
| <i>ATP6V1B1</i> | Renal tubular acidosis with progressive deafness                                                                  |
| <i>ATP7B</i>    | Wilson disease                                                                                                    |
| <i>AVPR2</i>    | Diabetes insipidus, nephrogenic<br>Nephrogenic syndrome of inappropriate antidiuresis                             |
| <i>B2M</i>      | Amyloidosis, familial visceral                                                                                    |
| <i>B9D1</i>     | Meckel syndrome 9<br>Joubert syndrome 27                                                                          |
| <i>B9D2</i>     | Meckel syndrome 10<br>Joubert syndrome 34                                                                         |
| <i>BBS1</i>     | Bardet-Biedl syndrome 1                                                                                           |
| <i>BBS10</i>    | Bardet-Biedl syndrome 10                                                                                          |
| <i>BBS12</i>    | Bardet-Biedl syndrome 12                                                                                          |
| <i>BBS2</i>     | Bardet-Biedl syndrome 2                                                                                           |
| <i>BBS4</i>     | Bardet-Biedl syndrome 4                                                                                           |
| <i>BBS5</i>     | Bardet-Biedl syndrome 5                                                                                           |
| <i>BBS7</i>     | Bardet-Biedl syndrome 7                                                                                           |
| <i>BBS9</i>     | Bardet-Biedl syndrome 9                                                                                           |
| <i>BICC1</i>    | {Renal dysplasia, cystic, susceptibility to}                                                                      |
| <i>BMP4</i>     | Microphthalmia, syndromic 6                                                                                       |

|                |                                                                                                                      |
|----------------|----------------------------------------------------------------------------------------------------------------------|
| <i>BSND</i>    | Bartter syndrome type 4a<br>Sensorineural deafness with mild renal dysfunction                                       |
| <i>C1QA</i>    | C1q deficiency                                                                                                       |
| <i>C1QB</i>    | C1q deficiency                                                                                                       |
| <i>C1QC</i>    | C1q deficiency                                                                                                       |
| <i>C3</i>      | C3 deficiency<br>{Hemolytic uremic syndrome, atypical, susceptibility to, 5}                                         |
| <i>C5orf42</i> | Joubert syndrome 17                                                                                                  |
| <i>CA2</i>     | Osteopetrosis, autosomal recessive 3, with renal tubular acidosis                                                    |
| <i>CASR</i>    | Hypocalcaemia, autosomal dominant with Bartter syndrome<br>Hypocalcuric hypercalcaemia, type I                       |
| <i>CC2D2A</i>  | COACH syndrome<br>Joubert syndrome<br>Meckel syndrome                                                                |
| <i>CCND1</i>   | {von Hippel-Lindau, syndrome, modifier of}                                                                           |
| <i>CD151</i>   | Nephropathy with pretibial epidermolysis bullosa and deafness                                                        |
| <i>CD2AP</i>   | Glomerulosclerosis, focal segmental, 3                                                                               |
| <i>CD46</i>    | {Hemolytic uremic syndrome, atypical, susceptibility to, 2}                                                          |
| <i>CEP164</i>  | Nephronophthisis 15                                                                                                  |
| <i>CEP290</i>  | Bardet-Biedl syndrome,<br>Joubert syndrome,<br>Meckel syndrome,<br>Senior-Loken syndrome                             |
| <i>CEP41</i>   | Joubert syndrome 15                                                                                                  |
| <i>CEP83</i>   | Nephronophthisis 18                                                                                                  |
| <i>CFB</i>     | {Hemolytic uremic syndrome, atypical, susceptibility to, 4}                                                          |
| <i>CFD</i>     | Complement Factor D deficiency                                                                                       |
| <i>CFH</i>     | Complement factor H deficiency and<br>{Hemolytic uremic syndrome, atypical, susceptibility to, 1}                    |
| <i>CFHR1</i>   | {Hemolytic uremic syndrome, atypical, susceptibility to}                                                             |
| <i>CFHR2</i>   |                                                                                                                      |
| <i>CFHR3</i>   | {Hemolytic uremic syndrome, atypical, susceptibility to}                                                             |
| <i>CFHR5</i>   | Nephropathy due to CFHR5 deficiency                                                                                  |
| <i>CFI</i>     | Complement factor I deficiency<br>{Hemolytic uremic syndrome, atypical, susceptibility to, 3}                        |
| <i>CHD1L</i>   | None listed                                                                                                          |
| <i>CHRM3</i>   | Prune belly syndrome                                                                                                 |
| <i>CLCN5</i>   | Dent disease<br>Nephrolithiasis, type I<br>Proteinuria, low molecular weight, with hypercalcuric<br>nephrocalcinosis |
| <i>CLCNKA</i>  | Bartter syndrome, type 4b, digenic                                                                                   |
| <i>CLCNKB</i>  | Bartter syndrome, type 3<br>Bartter syndrome, type 4B, digenic                                                       |
| <i>CLDN16</i>  | Hypomagnesemia 3, renal                                                                                              |
| <i>CLDN19</i>  | Hypomagnesemia 5, renal, with ocular involvement                                                                     |
| <i>CNNM2</i>   | Hypomagnesemia 6, renal<br>Hypomagnesemia, seizures and mental retardation                                           |
| <i>COL4A1</i>  | Angiopathy, hereditary, with nephropathy, aneurysms, and muscle<br>cramps                                            |
| <i>COL4A3</i>  | Alport syndrome 2, autosomal recessive                                                                               |

|               |                                                                                                                             |
|---------------|-----------------------------------------------------------------------------------------------------------------------------|
|               | Alport Syndrome 3, autosomal dominant<br>Haematuria, familial benign                                                        |
| <i>COL4A4</i> | Alport syndrome, autosomal recessive<br>Haematuria, familial benign                                                         |
| <i>COL4A5</i> | Alport syndrome 1, X-linked                                                                                                 |
| <i>COL4A6</i> | Deafness, X-linked 6                                                                                                        |
| <i>COQ2</i>   | Coenzyme Q10 deficiency, primary, 1                                                                                         |
| <i>COQ6</i>   | Coenzyme Q10 deficiency, primary, 6                                                                                         |
| <i>CRB2</i>   | Focal segmental glomerulosclerosis 9<br>Ventriculomegaly with cystic kidney disease                                         |
| <i>CSPP1</i>  | Joubert syndrome 21                                                                                                         |
| <i>CTNS</i>   | Cystinosis, nephropathic<br>Cystinosis, late-onset juvenile or adolescent nephropathic<br>Cystinosis, atypical nephropathic |
| <i>CUL3</i>   | Pseudohypoaldosteronism, type IIE                                                                                           |
| <i>DCDC2</i>  | Nephronophthisis 19                                                                                                         |
| <i>DGKE</i>   | Nephrotic syndrome, type 7                                                                                                  |
| <i>DSTYK</i>  | Congenital anomalies of kidney and urinary tract                                                                            |
| <i>DZIP1L</i> | Polycystic kidney disease 5                                                                                                 |
| <i>EHHADH</i> | Fanconi renotubular syndrome 3                                                                                              |
| <i>EMP2</i>   | Nephrotic syndrome, type 10                                                                                                 |
| <i>ETFA</i>   | Glutaric acidemia IIA                                                                                                       |
| <i>ETFB</i>   | Glutaric acidemia IIB                                                                                                       |
| <i>ETFDH</i>  | Glutaric acidemia IIC                                                                                                       |
| <i>EYA1</i>   | Branchiootorenal syndrome 1, with or without cataracts                                                                      |
| <i>FAH</i>    | Tyrosinemia, type I                                                                                                         |
| <i>FAN1</i>   | Interstitial nephritis, karyomegalic                                                                                        |
| <i>FGF20</i>  | Renal hypodysplasia/aplasia 2                                                                                               |
| <i>FGF23</i>  | Hypophosphatemic rickets, autosomal dominant<br>Tumoral calcinosis, hyperphosphatemic, familial 2                           |
| <i>FN1</i>    | Glomerulopathy with fibronectin deposits 2                                                                                  |
| <i>FRAS1</i>  | Fraser syndrome 1                                                                                                           |
| <i>FREM1</i>  | Manitoba oculotrichoanal syndrome                                                                                           |
| <i>FREM2</i>  | Fraser syndrome 2                                                                                                           |
| <i>FXD2</i>   | Hypomagnesemia 2, renal                                                                                                     |
| <i>GANAB</i>  | Polycystic kidney disease 3                                                                                                 |
| <i>GATA3</i>  | Hypoparathyroidism, sensorineural deafness, and renal dysplasia                                                             |
| <i>GLA</i>    | Fabry disease                                                                                                               |
| <i>GLI3</i>   | Pallister-Hall syndrome                                                                                                     |
| <i>GLIS2</i>  | Nephronophthisis 7                                                                                                          |
| <i>GPC3</i>   | Simpson-Golabi-Behmel syndrome, type 1<br>Wilms tumour, somatic                                                             |
| <i>GRHPR</i>  | Hyperoxaluria, primary, type II                                                                                             |
| <i>GRIP1</i>  | Fraser syndrome 3                                                                                                           |
| <i>GSN</i>    | Amyloidosis, Finnish type                                                                                                   |
| <i>HNF1B</i>  | Autosomal Dominant Tubulointerstitial Disease- <i>HNF1B</i>                                                                 |
| <i>HNF4A</i>  | Fanconi renotubular syndrome 4, with maturity-onset diabetes of<br>the young                                                |
| <i>HOGA1</i>  | Hyperoxaluria, primary, type III                                                                                            |

|                |                                                                                      |
|----------------|--------------------------------------------------------------------------------------|
| <i>HPSE2</i>   | Urofacial syndrome 1                                                                 |
| <i>HSD11B2</i> | Apparent mineralocorticoid excess                                                    |
| <i>IFNG</i>    |                                                                                      |
| <i>IFT122</i>  | Cranioectodermal dysplasia 1                                                         |
| <i>IFT140</i>  | Short-rib thoracic dysplasia 9 with or without polydactyly                           |
| <i>IFT43</i>   | Cranioectodermal dysplasia 3                                                         |
| <i>INF2</i>    | Glomerulosclerosis, focal segmental, 5                                               |
| <i>INPP5E</i>  | Joubert syndrome 1                                                                   |
| <i>INVS</i>    | Nephronophthisis 2, infantile                                                        |
| <i>IQCB1</i>   | Senior-Loken syndrome 5                                                              |
| <i>ITGA3</i>   | Interstitial lung disease, nephrotic syndrome, and epidermolysis bullosa, congenital |
| <i>ITGA8</i>   | Renal hypodysplasia/aplasia 1                                                        |
| <i>JAG1</i>    | Alagille Syndrome                                                                    |
| <i>KAL1</i>    | Hypogonadotropic hypogonadism 1 with or without anosmia (Kallmann syndrome 1)        |
| <i>KCNJ1</i>   | Bartter syndrome, type 2                                                             |
| <i>KIF7</i>    | Joubert syndrome 12                                                                  |
| <i>KLHL3</i>   | Pseudohypoaldosteronism, type IID                                                    |
| <i>LAMB2</i>   | Nephrotic syndrome, type 5, with or without ocular abnormalities                     |
| <i>LCAT</i>    | Norum disease                                                                        |
| <i>LMX1B</i>   | Nail-patella syndrome                                                                |
| <i>LRIG2</i>   | Urofacial syndrome 2                                                                 |
| <i>LYZ</i>     | Amyloidosis, renal                                                                   |
| <i>MAGI2</i>   | Nephrotic syndrome 15                                                                |
| <i>MAPKBP1</i> | Nephronophthisis 20                                                                  |
| <i>MASP1</i>   | 3MC syndrome                                                                         |
| <i>MEFV</i>    | Familial Mediterranean fever                                                         |
| <i>MKKS</i>    | Bardet-Biedl syndrome 6                                                              |
| <i>MKS1</i>    | Bardet-Biedl syndrome 13<br>Joubert syndrome 28<br>Meckel syndrome 1                 |
| <i>MUC1</i>    | Autosomal Dominant Tubulointerstitial Disease- <i>MUC1</i>                           |
| <i>MYH9</i>    | Epstein syndrome and Fechtner syndrome                                               |
| <i>MYO1E</i>   | Glomerulosclerosis, focal segmental, 6                                               |
| <i>NEK8</i>    | Nephronophthisis 9<br>Renal-hepatic-pancreatic dysplasia 2                           |
| <i>NOTCH2</i>  | Alagille syndrome 2<br>Hajdu-Cheney syndrome                                         |
| <i>NPHP1</i>   | Joubert syndrome 4<br>Nephronophthisis 1<br>Senior-Loken syndrome                    |
| <i>NPHP3</i>   | Meckel syndrome 7<br>Nephronophthisis 3<br>Renal-hepatic-pancreatic dysplasia 1      |
| <i>NPHP4</i>   | Nephronophthisis 4<br>Senior-Loken syndrome 4                                        |
| <i>NPHS1</i>   | Nephrotic syndrome, type 1                                                           |
| <i>NPHS2</i>   | Nephrotic syndrome, type 2                                                           |

|                 |                                                                                          |
|-----------------|------------------------------------------------------------------------------------------|
| <i>NR3C2</i>    | Pseudohypoaldosteronism type I, autosomal dominant                                       |
| <i>NUP107</i>   | Nephrotic syndrome, type 11                                                              |
| <i>NUP205</i>   | Nephrotic syndrome, type 13                                                              |
| <i>NUP93</i>    | Nephrotic syndrome, type 12                                                              |
| <i>OCRL</i>     | Dent disease 2<br>Lowe syndrome                                                          |
| <i>OFD1</i>     | Joubert syndrome 10                                                                      |
| <i>PAX2</i>     | Papillonephrosis<br>Glomerulosclerosis, focal segmental, 7                               |
| <i>PDSS2</i>    | Coenzyme Q10 deficiency, primary, 3                                                      |
| <i>PKD1</i>     | Polycystic kidney disease 1                                                              |
| <i>PKD2</i>     | Polycystic kidney disease 2                                                              |
| <i>PKHD1</i>    | Polycystic kidney disease 4, with or without hepatic disease                             |
| <i>PKHD1L1</i>  | None listed but suggested as a PKD locus                                                 |
| <i>PLCE1</i>    | Nephrotic syndrome, type 3                                                               |
| <i>PRPS1</i>    | Phosphoribosylpyrophosphate synthetase superactivity                                     |
| <i>PTPRO</i>    | Nephrotic syndrome, type 6                                                               |
| <i>REN</i>      | Renal tubular dysgenesis<br>Hyperuricemic nephropathy, familial juvenile 2               |
| <i>RET</i>      | Congenital renal defects                                                                 |
| <i>ROBO2</i>    | Vesicoureteral reflux 2                                                                  |
| <i>RPGRIP1L</i> | COACH syndrome<br>Joubert syndrome 7<br>Meckel syndrome 5                                |
| <i>RRM2B</i>    | Mitochondrial DNA depletion syndrome 8A (encephalomyopathic type with renal tubulopathy) |
| <i>SALL1</i>    | Townes-Brocks syndrome 1<br>Townes-Brocks branchiotorenal-like syndrome                  |
| <i>SARS2</i>    | Hyperuricemia, pulmonary hypertension, renal failure, and alkalosis                      |
| <i>SCARB2</i>   | Epilepsy, progressive myoclonic 4, with or without renal failure                         |
| <i>SCNN1B</i>   | Liddle Syndrome<br>Pseudohypoaldosteronism                                               |
| <i>SCNN1G</i>   | Liddle Syndrome<br>Pseudohypoaldosteronism                                               |
| <i>SDCCAG8</i>  | Bardet-Biedl syndrome 16<br>Senior-Loken syndrome 7                                      |
| <i>SEC61A1</i>  | Hyperuricemic Nephropathy, familial juvenile, 4                                          |
| <i>SGPL1</i>    | Nephrotic syndrome 14                                                                    |
| <i>SIX1</i>     | Branchiootic syndrome 3                                                                  |
| <i>SIX5</i>     | Branchiootorenal syndrome 2                                                              |
| <i>SLC12A1</i>  | Bartter syndrome, type 1                                                                 |
| <i>SLC12A3</i>  | Gitelman syndrome                                                                        |
| <i>SLC1A1</i>   | Dicarboxylic aminoaciduria                                                               |
| <i>SLC22A12</i> | Hypouricemia, renal                                                                      |
| <i>SLC2A2</i>   | Fanconi-Bickel syndrome                                                                  |
| <i>SLC2A9</i>   | Hypouricemia, renal, 2                                                                   |
| <i>SLC34A1</i>  | Nephrolithiasis/osteoporosis, hypophosphatemic, 1<br>Fanconi renal tubular syndrome 2    |
| <i>SLC3A1</i>   | Cystinuria                                                                               |
| <i>SLC4A1</i>   | Renal tubular acidosis                                                                   |

|                 |                                                                                                                       |
|-----------------|-----------------------------------------------------------------------------------------------------------------------|
| <i>SLC4A4</i>   | Renal tubular acidosis, proximal, with ocular abnormalities                                                           |
| <i>SLC5A2</i>   | Renal glucosuria                                                                                                      |
| <i>SLC7A7</i>   | Lysinuric protein intolerance                                                                                         |
| <i>SLC7A9</i>   | Cystinuria                                                                                                            |
| <i>SLC9A3R1</i> | Nephrolithiasis/osteoporosis, hypophosphatemic, 2                                                                     |
| <i>SMARCAL1</i> | Schimke immunosseous dysplasia                                                                                        |
| <i>SOX17</i>    | Vesicoureteral reflux 3                                                                                               |
| <i>TBX18</i>    | Congenital anomalies of kidney and urinary tract 2                                                                    |
| <i>TCTN1</i>    | Joubert syndrome 13                                                                                                   |
| <i>TCTN2</i>    | Joubert syndrome 24<br>Meckel Syndrome 8                                                                              |
| <i>TCTN3</i>    | Joubert syndrome 18                                                                                                   |
| <i>THBD</i>     | {Hemolytic uremic syndrome, atypical, susceptibility to, 6}                                                           |
| <i>TMEM138</i>  | Joubert syndrome 16                                                                                                   |
| <i>TMEM216</i>  | Joubert syndrome 2<br>Meckel syndrome 2                                                                               |
| <i>TMEM231</i>  | Joubert syndrome 20<br>Meckel syndrome 11                                                                             |
| <i>TMEM237</i>  | Joubert syndrome 14                                                                                                   |
| <i>TMEM67</i>   | COACH syndrome<br>Joubert syndrome<br>Meckel syndrome<br>Nephronophthisis 11<br>Bardet Biedl Syndrome 14, modifier of |
| <i>TNXB</i>     | Vesicoureteral reflux 8                                                                                               |
| <i>TRIM32</i>   | Bardet-Biedl syndrome 11                                                                                              |
| <i>TRPC6</i>    | Glomerulosclerosis, focal segmental, 2                                                                                |
| <i>TSC1</i>     | Tuberous sclerosis-1                                                                                                  |
| <i>TSC2</i>     | Tuberous Sclerosis-2                                                                                                  |
| <i>TTC21B</i>   | Nephronophthisis 12                                                                                                   |
| <i>TTC8</i>     | Bardet-Biedl syndrome 8                                                                                               |
| <i>UMOD</i>     | Autosomal Dominant Tubulointerstitial Disease- <i>UMOD</i>                                                            |
| <i>VHL</i>      | von Hippel-Lindau syndrome                                                                                            |
| <i>VIPAS39</i>  | Arthrogryposis, renal dysfunction, and cholestasis 2                                                                  |
| <i>VPS33B</i>   | Arthrogryposis, renal dysfunction, and cholestasis 1                                                                  |
| <i>WDPCP</i>    | ?Bardet-Biedl syndrome 15                                                                                             |
| <i>WDR19</i>    | Nephronophthisis 13<br>Senior-Loken syndrome                                                                          |
| <i>WDR35</i>    | Cranioectodermal dysplasia 2<br>Short-rib thoracic dysplasia 7 with or without polydactyly                            |
| <i>WDR73</i>    | Galloway-Mowat syndrome                                                                                               |
| <i>WNK4</i>     | Pseudohypoaldosteronism, type IIB                                                                                     |
| <i>WNT4</i>     | SERKAL Syndrome                                                                                                       |
| <i>WT1</i>      | Nephrotic syndrome type 4<br>Wilms tumour<br>Denys-Drash syndrome<br>Frasier syndrome                                 |
| <i>XPNPEP3</i>  | Nephronophthisis-like nephropathy 1                                                                                   |
| <i>ZMYND10</i>  | Ciliary dyskinesia, primary, 22                                                                                       |



|        |                                            |
|--------|--------------------------------------------|
| ZNF423 | Joubert syndrome 19<br>Nephronophthisis 14 |
|        |                                            |

**Supplementary Table 2: Original and revised pathological diagnosis in patients who underwent percutaneous renal biopsy**

**DDD**, Dense Deposit Disease; **EM**, Electronmicroscopy; **FSGS**, Focal segmental glomerulosclerosis, **GN**, Glomerulonephritis; **IF**, immunofluorescence; **IgA**, Immunglobin A; **LM**, light microscopy; **MPGN**, Membranoproliferative Glomerulonephritis **TI**, tubulointerstitial; **TIKD**, Tubulointersitital kidney disease; **TMA**, Thrombotic Microangiopathy

| Family Number                              | Number | Original Diagnostic Category | Original pathological Diagnosis | Family History | Number of Glomeruli on LM | Percentage Fibrosis (%) | Reviewed | Available for Review |     |     | Change in Diagnosis | New Diagnostic Category | New Pathological Diagnosis       |
|--------------------------------------------|--------|------------------------------|---------------------------------|----------------|---------------------------|-------------------------|----------|----------------------|-----|-----|---------------------|-------------------------|----------------------------------|
|                                            |        |                              |                                 |                |                           |                         |          | LM                   | IF  | EM  |                     |                         |                                  |
| <b>Patients with a Molecular Diagnosis</b> |        |                              |                                 |                |                           |                         |          |                      |     |     |                     |                         |                                  |
| 1                                          | 1A     | TIKD                         | Familial TIKD                   | Yes            | 3                         | 20                      | Yes      | Yes                  | No  | No  | No                  | TIKD                    | Familial TIKD                    |
| 2                                          | 2A     | TIKD                         | TIKD/ Gouty Nephropathy         | Yes            | 18                        | 50                      | Yes      | Yes                  | Yes | No  | No                  | TIKD                    | TIKD/Gouty Nephropathy           |
| 2                                          | 2B     | TIKD                         | TI Fibrosis                     | Yes            | 7                         | 20                      | Yes      | Yes                  | Yes | Yes | No                  | TIKD                    | TI Fibrosis                      |
| 2                                          | 2C     | TIKD                         | TI Fibrosis                     | Yes            | 60                        | 60                      | Yes      | Yes                  | Yes | Yes | No                  | TIKD                    | TI Fibrosis                      |
| 2                                          | 2D     | Glomerulonephritis           | MPGN/DDD                        | Yes            | 5                         | 20                      | Yes      | Yes                  | Yes | No  | No                  | Glomerulonephritis      | MPGN                             |
| 3                                          | 3A     | TIKD                         | Familial TIKD                   | Yes            | 12                        | 80                      | Yes      | Yes                  | Yes | Yes | No                  | TIKD                    | Familial TIKD                    |
| 3                                          | 3B     | TIKD                         | Familial TIKD                   | Yes            | 16                        | 70                      | Yes      | Yes                  | Yes | Yes | No                  | TIKD                    | Familial TIKD                    |
| 3                                          | 3C     | TIKD                         | Active TI nephritis             | Yes            | 38                        | 75                      | Yes      | Yes                  | Yes | Yes | No                  | TIKD                    | Active TI nephritis              |
| 3                                          | 3D     | TIKD                         | Familial TIKD                   | Yes            | 2                         | 75                      | Yes      | Yes                  | Yes | Yes | No                  | TIKD                    | Familial TIKD                    |
| 3                                          | 3E     | TIKD                         | Familial TIKD                   | Yes            | 12                        | 75                      | Yes      | Yes                  | Yes | Yes | No                  | TIKD                    | Familial TIKD                    |
| 3                                          | 3F     | TIKD                         | TI Fibrosis                     | Yes            | 18                        | 10                      | Yes      | Yes                  | Yes | Yes | No                  | TIKD                    | TI Fibrosis                      |
| 4                                          | 4A     | TIKD                         | Early fibrosis                  | Yes            | 2                         | 10                      | Yes      | Yes                  | Yes | Yes | No                  | TIKD                    | Early TI fibrosis                |
| 4                                          | 4B     | TMA                          | TMA                             | Yes            | 11                        | 20                      | Yes      | Yes                  | Yes | Yes | No                  | TMA                     | TMA                              |
| 5                                          | 5A     | TIKD                         | TI Inflammation                 | Yes            | 0                         | ?                       | No       | No                   | No  | No  | No                  | TIKD                    | TI Inflammation                  |
| 6                                          | 6A     | TIKD                         | Early nephronophthisis          | Yes            | 19                        | <10                     | Yes      | Yes                  | Yes | Yes | No                  | TIKD                    | Early nephronophthisis           |
| 6                                          | 6B     | TIKD                         | Juvenile nephronophthisis       | Yes            | 14                        | 60-70                   | Yes      | Yes                  | Yes | Yes | Yes                 | TMA                     | TMA & TIKD                       |
| 7                                          | 7A     | Glomerulonephritis           | Proliferative GN                | Yes            | 20                        | 10                      | Yes      | Yes                  | Yes | No  | No                  | Glomerulonephritis      | Proliferative Glomerulonephritis |
| 8                                          | 8A     | Glomerulonephritis           | IgA Nephropathy                 | Yes            | 22                        | 30                      | Yes      | Yes                  | Yes | Yes | No                  | Glomerulonephritis      | IgA Nephropathy                  |
| 8                                          | 8B     | Non-Specific                 | Arteriosclerosis with fibrosis  | Yes            | 3                         | 70                      | Yes      | Yes                  | Yes | Yes | No                  | Non-specific            | Arteriosclerosis with fibrosis   |
| 9                                          | 9A     | Glomerulonephritis           | Focal Proliferative GN          | Yes            | 14                        | 25                      | Yes      | Yes                  | Yes | Yes | No                  | Glomerulonephritis      | Focal Proliferative GN           |

|    |     |                    |                         |     |     |       |     |     |     |     |     |              |                         |
|----|-----|--------------------|-------------------------|-----|-----|-------|-----|-----|-----|-----|-----|--------------|-------------------------|
|    |     |                    |                         |     |     |       |     |     |     |     |     |              |                         |
|    |     |                    |                         |     |     |       |     |     |     |     |     |              |                         |
|    |     |                    |                         |     |     |       |     |     |     |     |     |              |                         |
| 11 | 11A | FSGS/Alport        | FSGS                    | Yes | 24  | 80    | Yes | Yes | Yes | Yes | No  | FSGS/Alport  | FSGS                    |
| 12 | 12A | FSGS/Alport        | Alport Syndrome         | Yes | 1   | 10    | Yes | Yes | Yes | Yes | No  | FSGS/Alport  | Alport Syndrome         |
| 13 | 13A | FSGS/Alport        | Alport Syndrome         | Yes | 4   | 10    | Yes | Yes | Yes | Yes | No  | FSGS/Alport  | Alport Syndrome         |
| 14 | 14A | FSGS/Alport        | FSGS/ADPKD              | No  | 6   | >50   | Yes | Yes | Yes | Yes | No  | FSGS/Alport  | FSGS                    |
| 15 | 15A | TIKD               | TIKD                    | Yes | 166 | 50    | Yes | Yes | Yes | Yes | No  | TIKD         | TIKD                    |
| 15 | 15B | TMA                | Chronic TMA/FSGS        | Yes | 24  | 75    | Yes | Yes | Yes | Yes | No  | TMA          | Chronic TMA/FSGS        |
| 15 | 15C | TMA                | Chronic TMA             | Yes | 12  | 30    | Yes | Yes | Yes | Yes | No  | TMA          | Chronic TMA             |
| 16 | 16A | FSGS/Alport        | Alport Syndrome         | Yes | 2   | 10    | Yes | Yes | Yes | Yes | No  | FSGS/Alport  | Alport Syndrome         |
| 17 | 17A | FSGS/Alport        | Alport Syndrome         | Yes | 6   | 30-55 | Yes | Yes | Yes | Yes | No  | FSGS/Alport  | Alport Syndrome         |
| 18 | 18A | Glomerulonephritis | Fibrillary GN           | Yes | 29  | 40    | Yes | Yes | Yes | Yes | Yes | TMA          | TMA & TBMD              |
| 18 | 18B | Glomerulonephritis | Fibrillary GN           | Yes | 12  | 50    | Yes | Yes | Yes | Yes | Yes | TMA          | TMA & TBMD              |
| 18 | 18C | Glomerulonephritis | Fibrillary GN           | Yes | 16  | 20    | Yes | Yes | Yes | Yes | Yes | TMA          | TMA & TBMD              |
| 18 | 18D | Glomerulonephritis | Fibrillary GN           | Yes | 3   | 60    | Yes | Yes | Yes | Yes | Yes | TMA          | TMA & TBMD              |
| 19 | 19A | TIKD               | TIKD                    | Yes | 10  | 20    | Yes | Yes | Yes | Yes | Yes | TMA          | TMA & TBMD              |
| 20 | 20A | TMA                | Acute TMA               | Yes | 12  | 15    | Yes | Yes | Yes | Yes | No  | TMA          | Acute TMA               |
| 20 | 20B | Non-Specific       | Oligomegonephronia      | Yes | 7   | 75    | Yes | Yes | Yes | Yes | No  | Non-specific | Oligomegonephronia      |
| 21 | 21A | Non-Specific       | Within normal limits    | Yes | 36  | 0     | Yes | Yes | Yes | Yes | No  | Non-specific | Within normal limits    |
| 21 | 21B | Non-Specific       | Mesangial Proliferation | Yes | 10  | 60-70 | yes | Yes | Yes | Yes | No  | Non-specific | Mesangial Proliferation |
| 22 | 22A | Non-Specific       | Arteriosclerosis        | Yes | 53  | 5     | No  | No  | No  | No  | No  | Non-specific | Arteriosclerosis        |
| 23 | 23A | Non-Specific       | Severe fibrosis         | No  | 0   | >70   | No  | No  | No  | No  | No  | Non-specific | Severe fibrosis         |

**Patients without a Molecular Diagnosis**

|    |     |                    |                                         |     |    |       |     |     |     |     |    |                    |                                                |
|----|-----|--------------------|-----------------------------------------|-----|----|-------|-----|-----|-----|-----|----|--------------------|------------------------------------------------|
| 1  | 1A  | TIKD               | Familial TIKD                           | Yes | 3  | 20    | Yes | Yes | No  | No  | No | TIKD               | Familial TIKD                                  |
| 10 | 10A | Glomerulonephritis | IgA Nephropathy                         | Yes | 30 | 20-25 | Yes | Yes | Yes | Yes | No | Glomerulonephritis | IgA Nephropathy                                |
| 10 | 10B | Glomerulonephritis | IgA Nephropathy                         | Yes | 11 | 60    | Yes | Yes | Yes | Yes | No | Glomerulonephritis | IgA Nephropathy                                |
| 10 | 10C | TMA                | Chronic TMA                             | Yes | 17 | 60    | Yes | Yes | Yes | Yes | No | TMA                | Chronic TMA                                    |
| 24 | 24A | TIKD               | Chronic Allergic Interstitial Nephritis | Yes | 20 | 80    | Yes | Yes | Yes | Yes | No | TIKD               | Chronic Interstitial Nephritis - allergic type |
| 25 | 25A | TIKD               | Acute interstitial nephritis            | Yes | 6  | 75    | Yes | Yes | Yes | Yes | no | TIKD               | Acute interstitial nephritis                   |

|    |     |                    |                                     |     |    |     |     |     |     |     |     |                    |                                     |
|----|-----|--------------------|-------------------------------------|-----|----|-----|-----|-----|-----|-----|-----|--------------------|-------------------------------------|
| 26 | 26A | Non-specific       | Non-specific mild changes           | Yes | 7  | <10 | No  | No  | No  | No  | No  | Non-specific       | Non-specific mild changes           |
| 26 | 26b | TIKD               | Nephronophtthisis                   | Yes | 9  | 50  | Yes | Yes | Yes | Yes | No  | TIKD               | Nephonophtthisis                    |
| 26 | 26C | TMA                | Chronic TMA                         | Yes | 4  | 15  | Yes | Yes | Yes | Yes | No  | TMA                | Chronic TMA                         |
| 27 | 27A | TIKD               | Chronic Interstitial Nephritis      | Yes | 31 | <10 | Yes | Yes | Yes | No  | No  | TIKD               | TIKD                                |
| 28 | 28A | Non-specific       | Arteriosclerosis                    | Yes | 57 | 75  | Yes | Yes | Yes | Yes | Yes | TMA                | Chronic TMA                         |
| 28 | 28B | Glomerulonephritis | IgA Nephropathy                     | Yes | 13 | 75  | Yes | Yes | Yes | No  | No  | Glomerulonephritis | IgA Nephropathy                     |
| 28 | 28C | Non-specific       | Hypertensive Nephrosclerosis        | Yes | 5  | 50  | Yes | Yes | Yes | no  | No  | Non-specific       | Hypertensive Nephrosclerosis        |
| 29 | 29A | Glomerulonephritis | IgA Nephropathy                     | Yes | 26 | 40  | Yes | Yes | Yes | No  | No  | Glomerulonephritis | IgA Nephropathy                     |
| 29 | 29b | Glomerulonephritis | IgA Nephropathy                     | Yes | 41 | 50  | Yes | Yes | Yes | No  | No  | Glomerulonephritis | IgA Nephropathy                     |
| 30 | 30A | Glomerulonephritis | IgA Nephropathy                     | Yes | 11 | 20  | Yes | Yes | Yes | Yes | No  | Glomerulonephritis | IgA Nephropathy                     |
| 31 | 31A | Glomerulonephritis | IgA Nephropathy                     | Yes | 12 | 15  | Yes | Yes | Yes | Yes | No  | Glomerulonephritis | IgA Nephropathy                     |
| 32 | 32A | Glomerulonephritis | IgA Nephropathy                     | Yes | 6  | <10 | Yes | Yes | Yes | No  | No  | Glomerulonephritis | IgA Nephropathy                     |
| 32 | 32B | Glomerulonephritis | IgA Nephropathy                     | Yes | 20 | 75  | Yes | Yes | Yes | Yes | No  | Glomerulonephritis | IgA Nephropathy                     |
| 33 | 33B | Glomerulonephritis | Crescentic GN                       | No  | 18 | <19 | Yes | Yes | Yes | No  | No  | Glomerulonephritis | Childhood GN                        |
| 34 | 34A | Glomerulonephritis | MPGN                                | Yes | 11 | <10 | Yes | Yes | Yes | Yes | Yes | TMA                | Chronic TMA                         |
| 34 | 34B | FSGS/Alport        | Alport Syndrome                     | Yes | 18 | 70  | Yes | Yes | Yes | Yes | No  | FSGS/Alport        | Alport Syndrome                     |
| 34 | 34C | TMA                | Chronic TMA                         | Yes | 16 | 20  | Yes | Yes | Yes | Yes | No  | TMA                | Chronic TMA                         |
| 35 | 35A | Glomerulonephritis | Congenital Nephrotic Syndrome       | No  | 20 | 30  | Yes | Yes | Yes | Yes | Yes | FSGS/Alport        | FSGS                                |
| 36 | 36A | Glomerulonephritis | Mesangial GN/Minimal Change variant | No  | 17 | 0   | Yes | Yes | Yes | Yes | No  | Glomerulonephritis | Mesangial GN/Minimal Change Variant |
| 37 | 37A | FSGS/Alport        | Alport Syndrome                     | Yes | -  | -   | Yes | Yes | Yes | Yes | No  | FSGS/Alport        | Alport Syndrome                     |
| 38 | 38A | FSGS/Alport        | FSGS                                | Yes | 18 | 35  | Yes | Yes | Yes | Yes | No  | FSGS/Alport        | FSGS                                |
| 39 | 39A | FSGS/Alport        | FSGS                                | No  | 19 | 30  | Yes | Yes | Yes | Yes | No  | FSGS/Alport        | FSGS                                |
| 40 | 40A | TMA                | Chronic TMA                         | Yes | 16 | 60  | Yes | Yes | Yes | Yes | No  | TMA                | Chronic TMA                         |
| 41 | 41A | TMA                | Acute or organising TMA             | no  | 22 | 75  | Yes | Yes | Yes | Yes | No  | TMA                | Acute or organising TMA             |
| 42 | 42A | Non-specific       | Hypertensive Nephrosclerosis        | Yes | 16 | 60  | Yes | Yes | Yes | Yes | no  | Non-specific       | Hypertensive Nephrosclerosis        |
| 43 | 43A | Non-specific       | Arteriosclerosis                    | Yes | 13 | 80  | Yes | Yes | Yes | Yes | No  | Non-specific       | Arteriosclerosis                    |
| 44 | 44A | Non-specific       | Arteriosclerosis                    | Yes | 24 | 70  | Yes | Yes | Yes | Yes | No  | Non-specific       | Arteriosclerosis                    |
| 45 | 45A | TMA                | Chronic TMA                         | Yes | 5  | 30  | Yes | Yes | No  | Yes | No  | TMA                | Chronic TMA                         |

|    |     |              |                                 |     |    |    |    |    |    |    |    |              |                                 |
|----|-----|--------------|---------------------------------|-----|----|----|----|----|----|----|----|--------------|---------------------------------|
| 50 | 47A | Non-specific | Glomerulosclerosis              | Yes | 24 | 50 | no | no | No | No | No | Non-specific | Glomerulosclerosis              |
| 51 | 48A | Non-specific | Prominent<br>Glomerulosclerosis | Yes | 53 | 30 | No | No | No | No | No | Non-Specific | Prominent<br>Glomerulosclerosis |

**Supplementary Table 3: ACMG Evidence in those in those in whom a pathogenic variant was detected, including presence or absence of ACMG pathogenic criteria weighted as very strong (PVS1), strong (PS1-4), moderate (PM1-6), or supporting (PP1-5)**

**AD**, Autosomal dominant; **AR**, Autosomal recessive; **c.**, coding DNA; **CHR**, Chromosome number; **D.C.**, Disease causing **Del**, deleterious; **F**, female; **het**, heterozygous; **hom**, homozygous, **M**, male; **N**, no; **p**, protein; **path**, pathogenic **Y**, yes

\***PPT**, Polyphen 2 (<http://genetics.bwh.harvard.edu/pph2>)

#**SIFT**, Sorting Intolerant from tolerant (<http://sift.jcvi.org/>)

~**MT**, Mutation taster (<http://mutationtaster.org>)

| ID | Institute at Which Diagnosis Was Made | Gene | Sex | CHR | Zygosity | Inheritance | Genetic Disease (OMIM Phenotype MIM No.)         | c and p change                 | RefSeq ID    | PP2* SIFT# MT~ | PVS | PS1 | PS2 | PS3 | PS4 | PM1 | PM2 | PM3 | PM4 | PM5 | PM6 | PP1 | PP2 | PP3 | PP4 | pp5 | variant class |
|----|---------------------------------------|------|-----|-----|----------|-------------|--------------------------------------------------|--------------------------------|--------------|----------------|-----|-----|-----|-----|-----|-----|-----|-----|-----|-----|-----|-----|-----|-----|-----|-----|---------------|
| 2A | RCSI                                  | UMOD | M   | 16  | het      | AD          | Medullary Cystic Kidney Disease Type II (603860) | c.G767G>A p.Cys256Tyr          | Nc_000016.10 | -              | N   | N   | N   | N   | N   | N   | Y   | N   | N   | N   | N   | Y   | Y   | Y   | Y   | N   | Likely path.  |
| 2B | Wake Forest                           | UMOD | F   | 16  | het      | AD          | Medullary Cystic Kidney Disease Type II (603860) | c.G767G>A p.Cys256Tyr          | Nc_000016.10 | -              | N   | N   | N   | N   | N   | N   | Y   | N   | N   | N   | N   | Y   | Y   | Y   | Y   | N   | Likely path.  |
| 2C | Wake Forest                           | UMOD | M   | 16  | het      | AD          | Medullary Cystic Kidney Disease Type II (603860) | c.G767G>A p.Cys256Tyr          | Nc_000016.10 | -              | N   | N   | N   | N   | N   | N   | Y   | N   | N   | N   | N   | Y   | Y   | Y   | Y   | N   | Likely path.  |
| 2D | Wake Forest                           | UMOD | M   | 16  | het      | AD          | Medullary Cystic Kidney Disease Type II (603860) | c.G767G>A p.Cys256Tyr          | Nc_000016.10 | -              | N   | N   | N   | N   | N   | N   | Y   | N   | N   | N   | N   | Y   | Y   | Y   | Y   | N   | Likely path.  |
| 3A | Wake Forest                           | MUC1 | F   | 1   | het      | AD          | Medullary Cystic Kidney Disease Type I (174000)  | c. ins(3n+1) in VNTR p. MUC1fs | -            | -              | Y   | Y   | N   | Y   | N   | N   | N   | N   | N   | N   | N   | Y   | N   | N   | N   | N   | Path.         |
| 3B | Wake Forest                           | MUC1 | F   | 1   | het      | AD          | Medullary Cystic Kidney Disease Type I (174000)  | c. ins(3n+1) in VNTR p. MUC1fs | -            | -              | Y   | Y   | N   | Y   | N   | N   | N   | N   | N   | N   | N   | Y   | N   | N   | N   | N   | Path.         |
| 3C | Wake Forest                           | MUC1 | F   | 1   | het      | AD          | Medullary Cystic Kidney Disease Type I (174000)  | c. ins(3n+1) in VNTR p. MUC1fs | -            | -              | Y   | Y   | N   | Y   | N   | N   | N   | N   | N   | N   | N   | Y   | N   | N   | N   | N   | Path.         |
| 3D | Wake Forest                           | MUC1 | M   | 1   | het      | AD          | Medullary Cystic Kidney Disease Type I (174000)  | c. ins(3n+1) in VNTR p. MUC1fs | -            | -              | Y   | Y   | N   | Y   | N   | N   | N   | N   | N   | N   | N   | Y   | N   | N   | N   | N   | Path.         |

|      |                            |         |   |    |      |           |                                                 |                                |                 |                |   |   |   |   |   |   |   |   |   |   |   |   |   |   |   |              |              |
|------|----------------------------|---------|---|----|------|-----------|-------------------------------------------------|--------------------------------|-----------------|----------------|---|---|---|---|---|---|---|---|---|---|---|---|---|---|---|--------------|--------------|
| 3E   | Wake Forest                | MUC1    | M | 1  | het  | AD        | Medullary Cystic Kidney Disease Type I (174000) | c. ins(3n+1) in VNTR p. MUC1fs | -               | -              | Y | Y | N | Y | N | N | N | N | N | N | N | Y | N | N | N | N            | Path.        |
| 3F   | Wake Forest                | MUC1    | F | 1  | het  | AD        | Medullary Cystic Kidney Disease Type I (174000) | c. ins(3n+1) in VNTR           | -               | -              | Y | Y | N | Y | N | N | N | N | N | N | N | Y | N | N | N | N            | Path.        |
| 4A   | Boston Children's Hospital | HNF1B   | F | 17 | het  | AD        | Renal Cysts and Diabetes Syndrome (137920)      | c.544+3_544 +6del /            | NM_000458.2     | :              | Y | N | N | N | N | N | Y | N | N | N | N | N | N | N | N | N            | Likely path. |
| 4B   | Boston Children's Hospital | HNF1B   | M | 17 | het  | AD        | Renal Cysts and Diabetes Syndrome (137920)      | c.544+3_544 +6del /            | NM_000458.2     | -              | Y | N | N | N | N | N | Y | N | N | N | N | N | N | N | N | N            | Likely path. |
| 5A   | Boston Children's Hospital | NPHP1   | F | 2  | hom  | AR        | Nephron- ophthisis 1, juvenile (256100)         | c.555_556insA p.Pro186Hisfs* 2 | NM_000272.3     | :              | Y | N | N | N | N | N | Y | N | N | N | N | Y | N | N | N | N            | Path.        |
| 6A   | Boston Children's Hospital | IFT140  | M | 16 | hom  | AR        | Mainzer-Saldino Syndrome (266920)               | c.634G>A p.Gly212Arg           | NM_014714.3     | 1.0 Del. D.C   | N | Y | N | N | N | N | Y | N | N | N | Y | N | Y | Y | N | Path.        |              |
| 6B   | Boston Children's Hospital | IFT140  | F | 16 | hom  | AR        | Mainzer-Saldino Syndrome (266920)               | c.634G>A p.Gly212Arg           | NM_014714.3     | 1.0 Del. D.C   | N | Y | N | N | N | N | Y | N | N | N | Y | N | Y | Y |   | Path.        |              |
| 7A   | Wake Forest                | MUC1    | F | 16 | het  | AD        | Medullary cystic kidney disease type I (174000) | c. ins(3n+1) in VNTR p. MUC1fs | -               | -              | Y | Y | N | Y | N | N | N | N | N | N | N | Y | N | N | N | N            | Path.        |
| 8A   | RCSI                       | COL4A 5 | M | X  | hemi | X linke d | Alport Syndrome 1, X linked (301050)            | c.2959_2976 del p.987_992del   | NM_000495       | -              | Y | N | N | N | N | N | Y | N | Y | N | N | N | N | N | Y | Y            | Likely path. |
| 8B   | RCSI                       | COL4A 5 | M | X  | hemi | X linke d | Alport Syndrome 1, X linked (301050)            | c.2959_2976 del p.987_992del   | NM_000495       | -              | Y | N | N | N | N | N | Y | N | Y | N | N | N | N | N | Y | Y            | Likely path. |
| 9A   | RCSI                       | COL4A 5 | M | X  | hemi | X linke d | Alport Syndrome 1, X linked (301050)            | c.3427 G>A p.Gly1143Ser        | NM_000495       | 1.0 Del. D.C.  | N | N | N | N | N | Y | Y | N | N | Y | N | N | Y | Y | N | N            | Likely path. |
| 11 A | Boston Children's Hospital | COL4A 5 | M | X  | hemi | X linke d | Alport Syndrome 1, X linked (301050)            | c.2605G>A p.Gly869Arg          | NM_033380.2     | 1.0 Del. D.C.  | N | N | N | Y | N | N | Y | Y | N | N | N | Y | Y | Y | Y | N            | Path.        |
| 12 A | Boston Children's Hospital | COL4A 5 | F | X  | hemi | X linke d | Alport Syndrome 1, X linked (301050)            | c.2396G>A p.Gly799Asp          | NM_033380.2     | 1.0 Del. D.C.  | N | N | N | N | N | N | Y | Y | N | N | N | Y | Y | Y | N | Likely path. |              |
| 13 A | Boston Children's Hospital | COL4A 5 | M | X  | hemi | X linke d | Alport Syndrome 1, X linked (301050)            | c.1423+1G>T                    | NM_033380.2     | -              | Y | N | N | N | N | N | Y | Y | N | N | N | N | N | N | Y | N            | Path.        |
| 14 A |                            | FANCI   | M | 15 | hom  | AR        | Fanconi Anaemia,                                | c.217A>T p.Ile73Phe            | NM_0011133 78.1 | 0.81 Del. D.C. | N | N | N | N | N | N | Y | N | N | N | Y | N | Y | Y | N | Likely Path. |              |

|      | Boston Children's Hospital |        |   |    |      |          | complementation group I (609053)                        |                                |              |                |   |   |   |   |   |   |   |   |   |   |   |   |   |   |   |   |              |              |
|------|----------------------------|--------|---|----|------|----------|---------------------------------------------------------|--------------------------------|--------------|----------------|---|---|---|---|---|---|---|---|---|---|---|---|---|---|---|---|--------------|--------------|
| 15 A | Wake Forest                | UMOD   | F | 16 | het  | AD       | Medullary Cystic Kidney Disease, Type II (603860)       | c.317G>A p.Cys106Tyr           | Nc_000016.10 | -              | N | N | N | N | N | N | Y | N | N | N | N | Y | Y | Y | Y | N | Likely Path. |              |
| 15 B | Wake Forest                | UMOD   | M | 16 | het  | AD       | Medullary Cystic Kidney Disease, Type II (603860)       | c.317G>A p.Cys106Tyr           | Nc_000016.10 | -              | N | N | N | N | N | N | Y | N | N | N | N | Y | Y | Y | Y | N | Likely Path. |              |
| 15 C | Wake Forest                | UMOD   | M | 16 | het  | AD       | Medullary Cystic Kidney Disease, Type II (603860)       | c.317G>A p.Cys106Tyr           | Nc_000016.10 | -              | N | N | N | N | N | N | Y | N | N | N | N | Y | Y | Y | Y | N | Likely path. |              |
| 16 A | RCSI                       | COL4A5 | M | X  | hemi | AD       | Alport Syndrome 1, X linked (301050)                    | c.1762G>A p.Gly588Ser          | NM_000495    | 1.0 Del D.C.   | N | N | N | N | N | N | Y | Y | N | N | N | N | Y | Y | Y | N | Likely path. |              |
| 17 A | RCSI                       | COL4A5 | M | X  | hemi | X linked | Alport Syndrome 1, X linked (301050)                    | c.3310G>T p.Gly1104Cys         | NM_000495    | 1.0 Del D.C.   | N | N | N | N | N | N | Y | Y | N | N | N | N | N | Y | Y | N | Likely path. |              |
| 18 A | RCSI                       | INF2   | M | 14 | het  | AD       | Glomerulosclerosis focal segmental, 5 (613237)          | c.640C>T p.Arg214Cys           | NM_001031714 | 1.0 Del D.C.   | N | N | N | N | N | N | Y | N | N | N | Y | N | N | N | Y | Y | N            | Likely path. |
| 18 B | RCSI                       | INF2   | F | 14 | het  | AD       | Glomerulosclerosis focal segmental, 5 (613237)          | c.640C>T p.Arg214Cys           | NM_001031714 | 1.0 Del D.C.   | N | N | N | N | N | N | Y | N | N | N | Y | N | N | N | Y | Y | N            | Likely path. |
| 18 C | RCSI                       | INF2   | M | 14 | het  | AD       | Glomerulosclerosis focal segmental, 5 (613237)          | c.640C>T p.Arg214Cys           | NM_001031714 | 1.0 Del D.C.   | N | N | N | N | N | N | Y | N | N | N | Y | N | N | N | Y | Y | N            | Likely path. |
| 18 D | RCSI                       | INF2   | M | 14 | het  | AD       | Glomerulosclerosis focal segmental, 5 (613237)          | c.640C>T p.Arg214Cys           | NM_001031714 | 1.0 Del D.C.   | N | N | N | N | N | N | Y | N | N | N | Y | N | N | N | Y | Y | N            | Likely path. |
| 19 A | Wake Forest                | MUC1   | M | 16 | het  | AD       | Medullary Cystic Kidney Disease, type I (174000)        | c. ins(3n+1) in VNTR p. MUC1fs | -            | -              | Y | Y | N | Y | N | N | N | N | N | N | N | N | N | N | N | N | Path.        |              |
| 20 A | RCSI                       | HNF1B  | F | 17 | het  | AD       | Renal Cysts and Diabetes Syndrome (137920)              | c.1255_1256del p.Ala419fs      | NM_001304286 | -              | Y | N | N | N | N | N | Y | N | N | N | N | Y | N | N | Y | N | Path.        |              |
| 20 B | RCSI                       | HNF1B  | M | 17 | het  | AD       | Renal Cysts and Diabetes Syndrome (137920)              | c.1255_1256del p.Ala419fs      | NM_001304286 | -              | Y | N | N | N | N | N | Y | N | N | N | N | Y | N | N | Y | N | Path.        |              |
| 21 A | Boston Children's Hospital | C3     | M | 19 | het  | AD       | Susceptibility to atypical haemolytic syndrome (612925) | c.4534C>T p.Arg1512Cys         | NM_000064.2  | 0.65 Del. D.C. | N | N | N | N | N | N | N | N | N | Y | N | Y | Y | Y | Y | N | Likely path. |              |

|         |                                  |               |   |    |     |    |                                                                        |                          |             |                      |   |   |   |   |   |   |   |   |   |   |   |   |   |   |   |                |                 |
|---------|----------------------------------|---------------|---|----|-----|----|------------------------------------------------------------------------|--------------------------|-------------|----------------------|---|---|---|---|---|---|---|---|---|---|---|---|---|---|---|----------------|-----------------|
| 21<br>B | Boston<br>Children's<br>Hospital | <i>INF2</i>   | F | 14 | het | AD | Glomerulos-<br>clerosis focal<br>segmental, 5<br>(613237)              | c.353T>A<br>p.Ile118Asn  | NM_022489.3 | 1.0<br>Del.<br>D.C.  | N | N | N | N | N | N | Y | N | N | Y | N | Y | N | Y | N | N              | Likely<br>path. |
| 22<br>A | Boston<br>Children's<br>Hospital | <i>WNK4</i>   | F | 17 | het | AD | Pseudo-<br>hypoaldoster-<br>onism -<br>hypertensive<br>CKD<br>(614491) | c.506C>T<br>p.Pro169Leu  | NM_032387.4 | 0.69<br>Del.<br>D.C. | N | Y | N | N | N | N | Y | N | N | N | N | y | N | Y | Y | N              | Path.           |
| 23<br>A | Boston<br>Children's<br>Hospital | <i>SLC3A1</i> | M | 2  | het | AD | Cystinuria<br>(220100)                                                 | c.1799G>A<br>p.Gly600Glu | NM_000341.3 | 1.0<br>Del.<br>D.C.  | N | Y | N | N | N | N | N | N | N | N | N | Y | Y | Y | N | Likely<br>path |                 |
